# Supplementary material for: Limnospira indica PCC 8005 Supplementation Prevents Pelvic Irradiation-Induced Dysbiosis but Not Acute Inflammation in Mice
Source: MDPI journal article supplement (doi:10.3390/antiox12030572), 2023-02-24
Supplement: s1 [file s1]

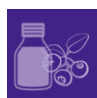

## Supplementary Materials

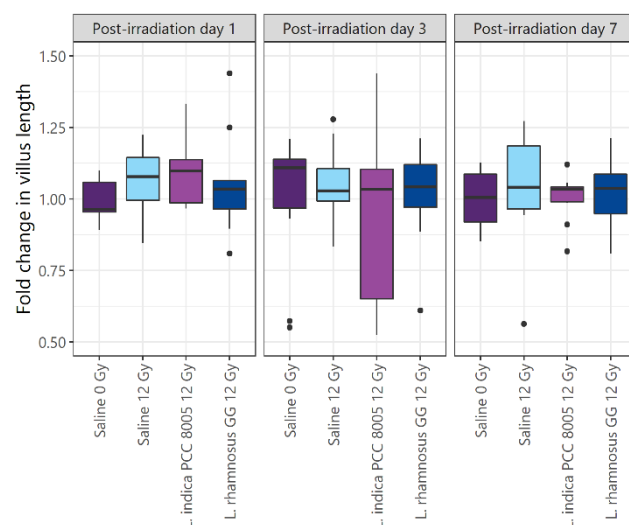

**Figure S1.** Boxplots showing the fold changes in mucosal parameter villus length following pelvic (sham-)irradiation for all different experimental groups,  $n = 10$  per group. Statistical differences were assessed by linear modelling.

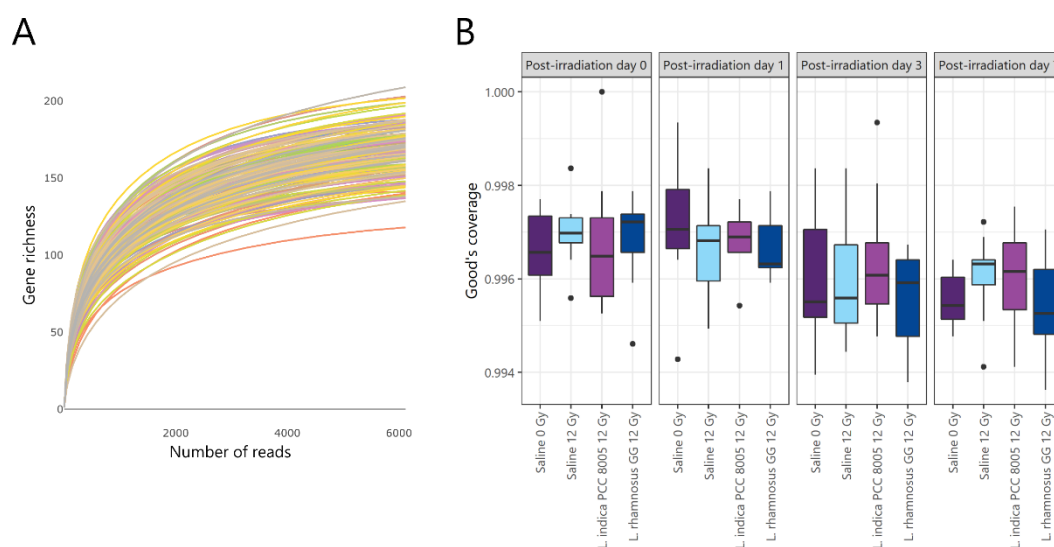

**Figure S2.** An adequate depth of sequencing was reached to identify most diversity in the samples. (A) Rarefaction curve displaying gene richness as a function of the number of reads per sample. (B) Good's estimator of coverage as a measure of sample completeness.

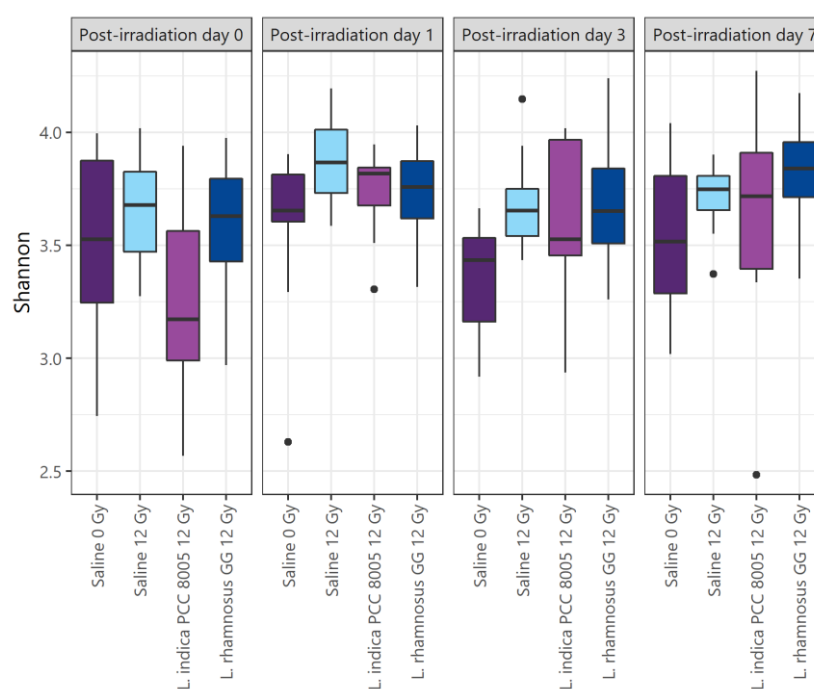

**Figure S3.** Changes in alpha diversity index Shannon, considering both richness and evenness, following (sham-)irradiation. Data are presented in boxplots,  $n = 10$  per group. Time independent and –dependent differences were assessed by Mann Whitney U test (Bonferroni’s post-hoc correction) and Wilcoxon signed rank test (Bonferroni’s post-hoc correction), respectively.

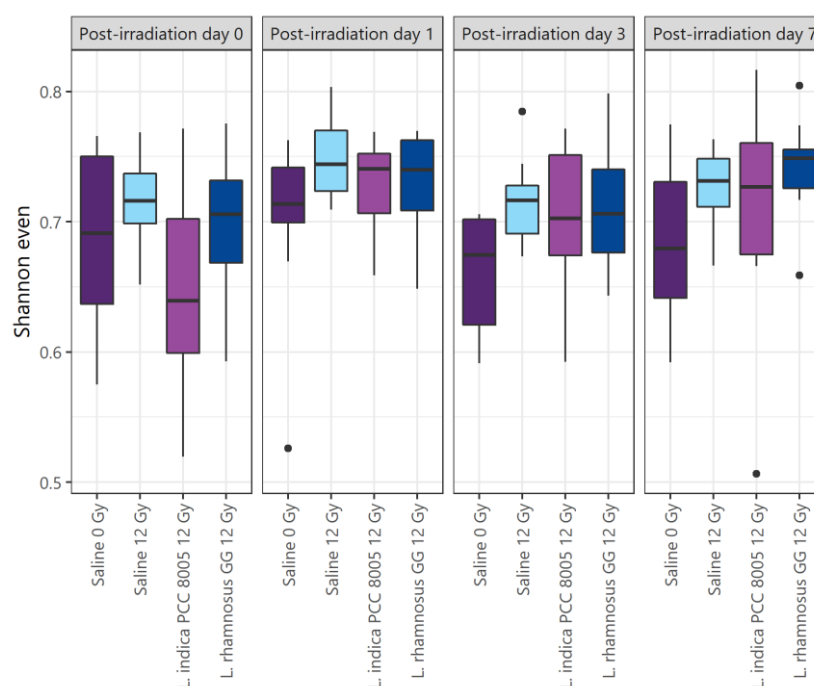

**Figure S4.** Changes in alpha diversity index Shannon even, considering solely evenness, following (sham-) irradiation. Data are presented in boxplots,  $n = 10$  per group. Time independent and –dependent differences were assessed by Mann Whitney U test (Bonferroni’s post-hoc correction) and Wilcoxon signed rank test (Bonferroni post-hoc correction), respectively.

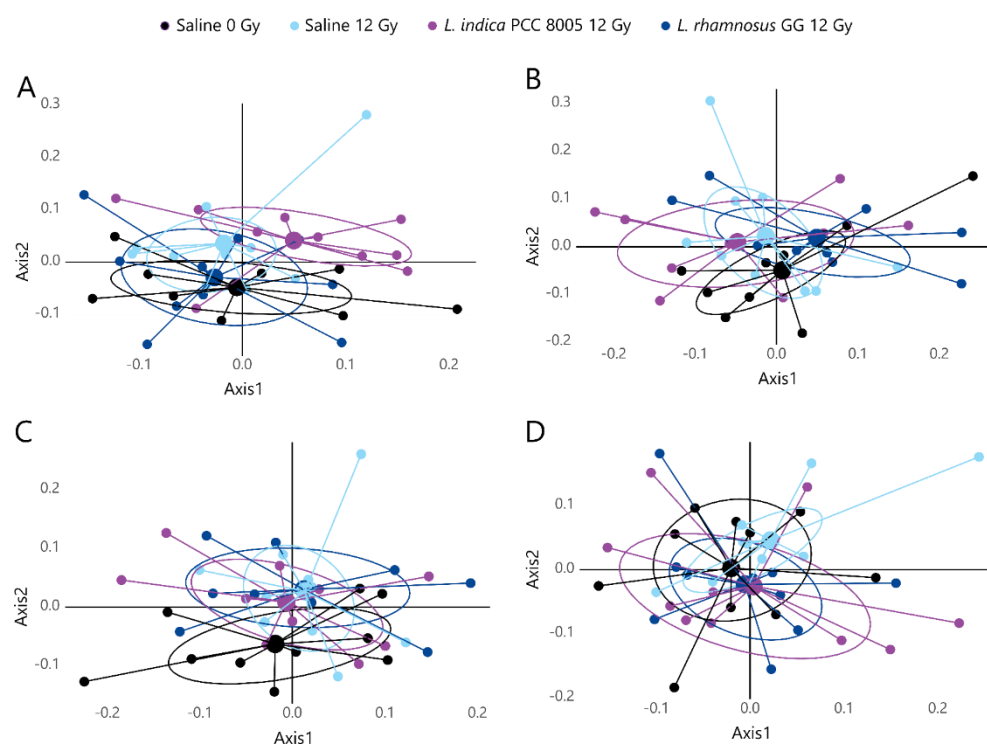

**Figure S5.** Unweighted UniFrac NMDS plots displaying inter-sample diversity among the different treatment groups at (A) post-irradiation day 0, (B) post-irradiation day 1, (C) post-irradiation day 3 and (D) post-irradiation day 7,  $n \geq 9$  per group.

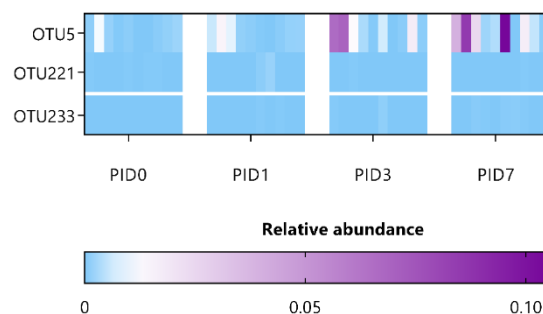

**Figure S6.** Heatmap representing the relative abundance of significant gut microbial dysbiosis markers detected in saline given mice following sham-irradiation as listed in Supplementary table 2,  $n = 10$  per time point. PID = post-irradiation day.

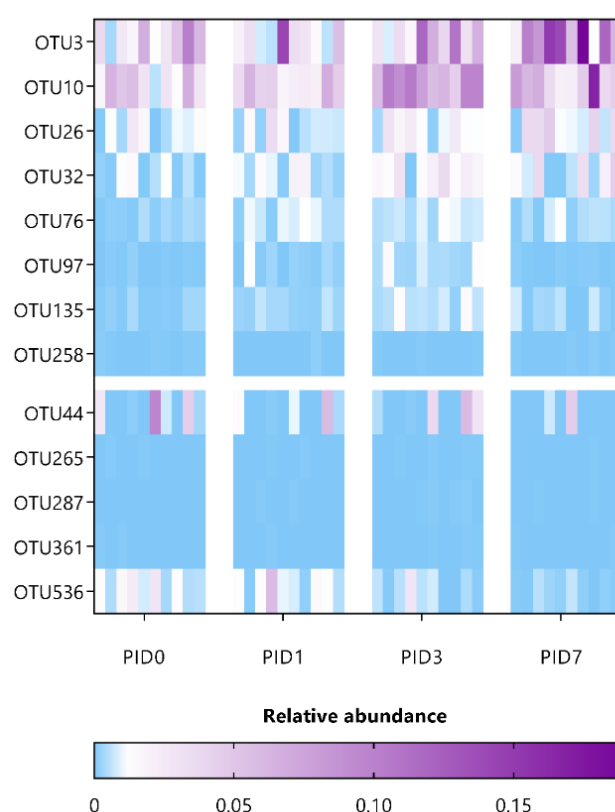

**Figure S7.** Heatmap representing the relative abundance of significant gut microbial dysbiosis markers detected in saline given mice following pelvic irradiation as listed in Supplementary table 3,  $n = 10$  per time point. PID = post-irradiation day.

**Table S1.**  $p$  values ( $^{\circ}p < 0.1$ ,  $*p < 0.05$ ,  $**p < 0.01$ ) of conditional unweighted UniFrac beta diversity analyses by AMOVA.

| Unweighted Unifrac<br>Beta Diversity |                                                                                 |
|--------------------------------------|---------------------------------------------------------------------------------|
| Overall $p$ value: 0.015 *           |                                                                                 |
| Post-hoc $p$ values:                 |                                                                                 |
| PID0                                 | • Saline 12 Gy vs Saline 0 Gy $p = 0.244$                                       |
|                                      | • <i>L. indica</i> PCC 8005 12 Gy vs Saline 0 Gy $p = 0.054$ °                  |
|                                      | • <i>L. rhamnosus</i> GG 12 Gy vs Saline 0 Gy $p = 0.16$                        |
|                                      | • <i>L. indica</i> PCC 8005 12 Gy vs Saline 12 Gy $p = 0.179$                   |
|                                      | • <i>L. rhamnosus</i> GG 12 Gy vs Saline 12 Gy $p = 0.125$                      |
|                                      | • <i>L. rhamnosus</i> GG 12 Gy vs <i>L. indica</i> PCC 8005 12 Gy $p = 0.007$ * |
| PID1                                 | Overall $p$ value: 0.235                                                        |
| PID3                                 | Overall $p$ value: 0.408                                                        |
| Overall $p$ value: 0.008 *           |                                                                                 |
| Post-hoc $p$ values:                 |                                                                                 |
| PID7                                 | • Saline 12 Gy vs Saline 0 Gy $p = 0.077$ °                                     |
|                                      | • <i>L. indica</i> PCC 8005 12 Gy vs Saline 0 Gy $p = 0.015$ *                  |
|                                      | • <i>L. rhamnosus</i> GG 12 Gy vs Saline 0 Gy $p = 0.034$ *                     |
|                                      | • <i>L. indica</i> PCC 8005 12 Gy vs Saline 12 Gy $p = 0.279$                   |
|                                      | • <i>L. rhamnosus</i> GG 12 Gy vs Saline 12 Gy $p = 0.132$                      |
|                                      | • <i>L. rhamnosus</i> GG 12 Gy vs <i>L. indica</i> PCC 8005 12 Gy $p = 0.79$    |

**Table S2.** Differential OTUs detected in saline given mice following sham-irradiation.

| <b>Taxonomic Classification<br/>(Following Ribosomal<br/>Database Project)</b> | <b>ANCOM Biomarkers' Effect<br/>Size and<br/>W-Statistic</b>           | <b>Highest NCBI Blast Hit (% Identity)</b>       |
|--------------------------------------------------------------------------------|------------------------------------------------------------------------|--------------------------------------------------|
| <i>Erysipelotrichaceae_OTU5</i>                                                | 1.47; W = 0.9 (PID3);<br>2.15; W = 0.9 (PID7)                          | <i>Faecalibaculum rodentium</i> (> 97% identity) |
| <i>Coriobacteriaceae_OTU221</i>                                                | 1.06; W = 0.9 (PID1);<br>1.06; W = 0.9 (PID3);<br>1.06; W = 0.9 (PID7) |                                                  |
| <i>Firmicutes_OTU233</i>                                                       | −1.27; W = 0.9 (PID7)                                                  |                                                  |

**Table S3.** Differential OTUs detected in saline given mice following pelvic irradiation.

| <b>Taxonomic Classification<br/>(Following Ribosomal Database<br/>Project)</b> | <b>ANCOM Biomarkers' Effect<br/>Size and<br/>W-Statistic</b>           | <b>Highest NCBI Blast Hit<br/>(% Identity)</b>    |
|--------------------------------------------------------------------------------|------------------------------------------------------------------------|---------------------------------------------------|
| <i>Lactobacillus_OTU3</i>                                                      | 1.10; W = 0.9 (PID7)                                                   | <i>Lactobacillus taiwanensis</i> (> 99% identity) |
| <i>Prevotella_OTU10</i>                                                        | 1.16; W = 0.9 (PID3)                                                   |                                                   |
| <i>Bacteroides_OTU26</i>                                                       | 1.10; W = 0.9 (PID7)                                                   | <i>Bacteroides stercorisoris</i> (> 98% identity) |
| <i>Porphyromonadaceae_OTU32</i>                                                | 1.04; W = 0.9 (PID1);<br>2.03; W = 0.9 (PID3);<br>1.51; W = 0.9 (PID7) |                                                   |
| <i>Porphyromonadaceae_OTU76</i>                                                | 1.08; W = 0.7 (PID3);<br>1.03; W = 0.7 (PID7)                          |                                                   |
| <i>Rhodospirillaceae_OTU97</i>                                                 | 2.01; W = 0.8 (PID3)                                                   |                                                   |
| <i>Alistipes_OTU135</i>                                                        | 1.90; W = 0.8 (PID3)                                                   | <i>Alistipes putredinis</i> (~97% identity)       |
| <i>Clostridiales_OTU258</i>                                                    | 1.09; W = 0.9 (PID1)                                                   |                                                   |
| <i>Lachnospiraceae_OTU44</i>                                                   | −1.14; W = 0.9 (PID7)                                                  |                                                   |
| <i>Ruminococcaceae_OTU265</i>                                                  | −1.16; W = 0.9 (PID3)                                                  |                                                   |
| <i>Bacteria_OTU287</i>                                                         | −1.05; W = 0.9 (PID3)                                                  |                                                   |
| <i>Lachnospiraceae_OTU361</i>                                                  | −1.12; W = 0.9 (PID3)                                                  |                                                   |
| <i>Lachnospiraceae_OTU536</i>                                                  | −1.84; W = 0.8 (PID7)                                                  |                                                   |
